# Supplementary material
Source: publisher figshare collection journal article supplement (https://sage.figshare.com/ndownloader/files/17708378)
Supplement: Supplementary file 1 [file 17708378]

## Appendix 1 Selection of participants for study inclusion

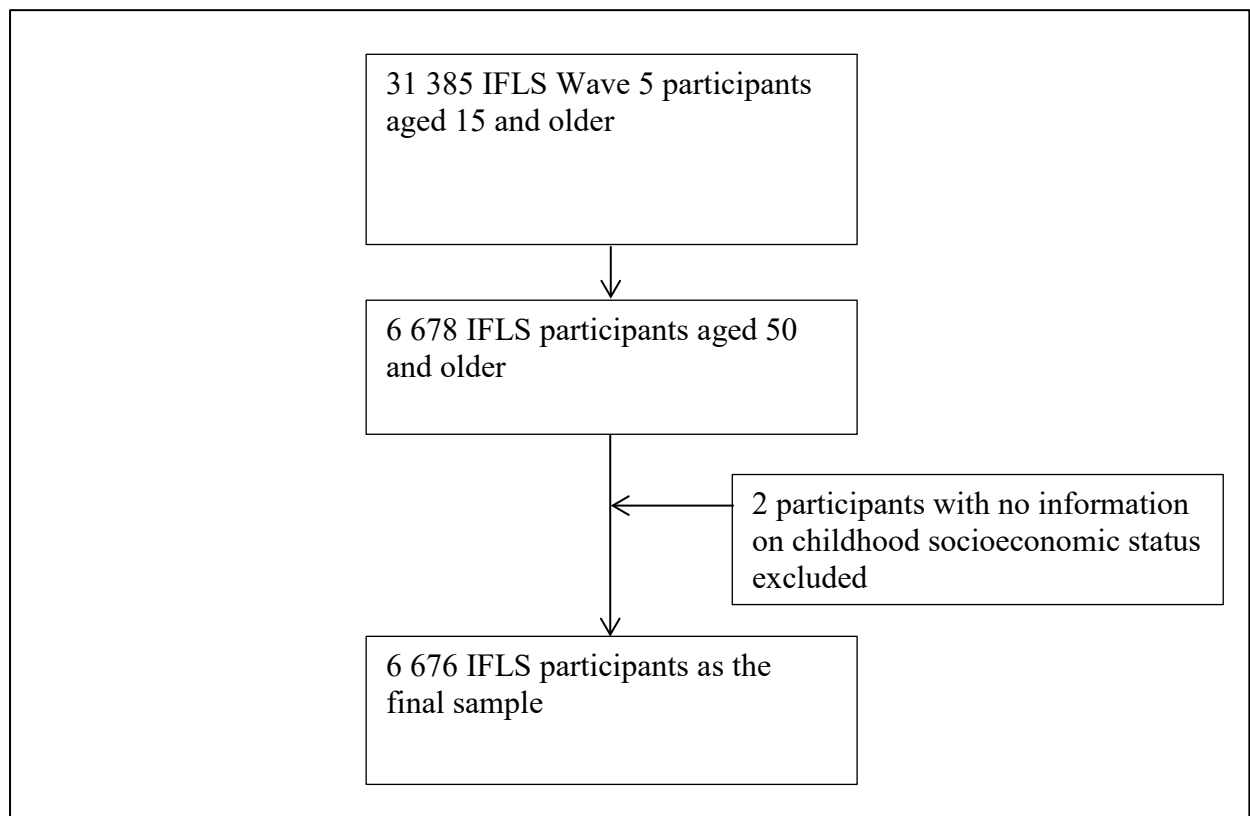

## Appendix 2 Childhood conditions and cognitive function as measured using mean of standardised cognitive score among older Indonesians

|                                               | Model 1         | Model 2          | Model 3          |
|-----------------------------------------------|-----------------|------------------|------------------|
|                                               | + childhood     | +Mid-life        | +Late-life       |
|                                               | conditions      | conditions       | conditions       |
| Age                                           | -0.01 (0.001)** | -0.007 (0.001)** | -0.007 (0.001)** |
| Female                                        | -0.11 (0.01)**  | -0.007 (0.01)    | -0.01 (0.02)     |
| Birth cohort (born after 1945)                | 0.13 (0.03)**   | 0.11 (0.03)**    | 0.09 (0.03)*     |
| Born in urban areas                           | -0.13 (0.02)**  | -0.07 (0.02)**   | -0.04 (0.02)*    |
| Childhood experience hunger                   | -0.03 (0.02)    | 0.02 (0.02)      | 0.01 (0.02)      |
| Number of facilities                          | 0.10 (0.01)**   | 0.03 (0.01)**    | 0.02 (0.01)*     |
| Number of books (1=few to 5=>200 books)       | 0.08 (0.01)**   | 0.02 (0.01)      | 0.02 (0.01)      |
| <i>Education (ref: less than high school)</i> |                 |                  |                  |
| High school                                   |                 | 0.32 (0.01)**    | 0.28 (0.02)**    |
| College or higher                             |                 | 0.54 (0.02)**    | 0.48 (0.03)**    |
| Living in urban areas                         |                 |                  | -0.10 (0.01)**   |
| <i>Marital status (ref: married)</i>          |                 |                  |                  |
| Single                                        |                 |                  | -0.07 (0.08)     |
| Divorced                                      |                 |                  | -0.05 (0.04)     |
| Widowed                                       |                 |                  | -0.008 (0.02)    |
| <i>Wealth (ref: 1<sup>st</sup> quintile)</i>  |                 |                  |                  |
| 2 <sup>nd</sup> quintile                      |                 |                  | 0.007 (0.02)     |
| 3 <sup>rd</sup> quintile                      |                 |                  | 0.03 (0.02)      |
| 4 <sup>th</sup> quintile                      |                 |                  | 0.10 (0.02)**    |
| 5 <sup>th</sup> quintile (wealthiest)         |                 |                  | 0.09 (0.02)**    |

|                                                   |               |              |                 |
|---------------------------------------------------|---------------|--------------|-----------------|
| Employed                                          |               |              | 0.03 (0.02)     |
| <i>Smoking behaviour (ref: non-smoker)</i>        |               |              |                 |
| Past smoker                                       |               |              | -0.02 (0.02)    |
| Current smoker                                    |               |              | -0.01 (0.03)    |
| Number of days doing moderate physical activities |               |              | 0.007 (0.002)*  |
| Number of days doing vigorous physical activities |               |              | -0.0001 (0.004) |
| Number of chronic diseases                        |               |              | -0.0001 (0.013) |
| Intercept                                         | 0.71 (0.13)** | 0.35 (0.12)* | 0.30 (0.14)     |

---

**Notes:** Reported are coefficients (standard errors). \*  $p < .05$ ; \*\*  $p < .001$ .
